# Supplementary figures and images for: Ribociclib Bioavailability Is Not Affected by Gastric pH Changes or Food Intake: In Silico and Clinical Evaluations
Source: PubMed Central journal article supplement — Clin Pharmacol Ther. 2017 Dec 8;104(2):374–83. doi: 10.1002/cpt.940 (PMC6099197; doi:10.1002/cpt.940), 2017-12-08

**A**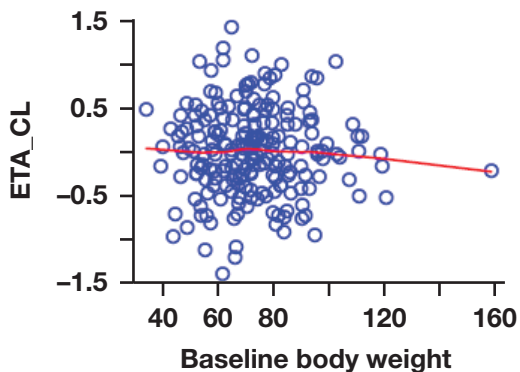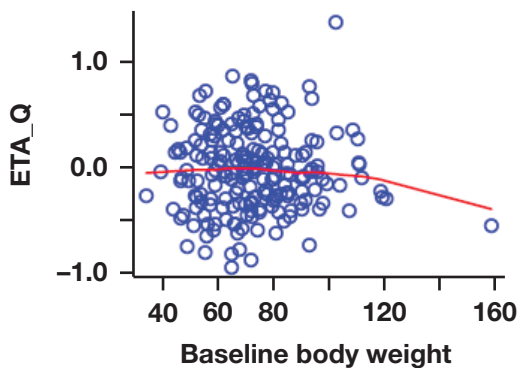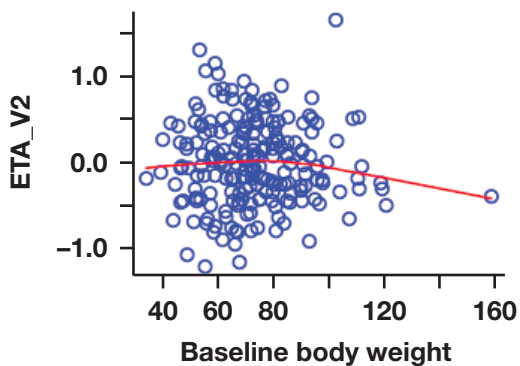**B**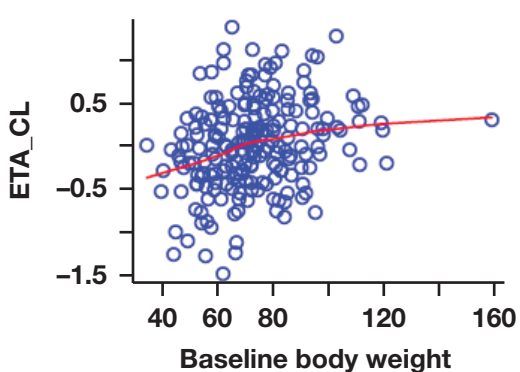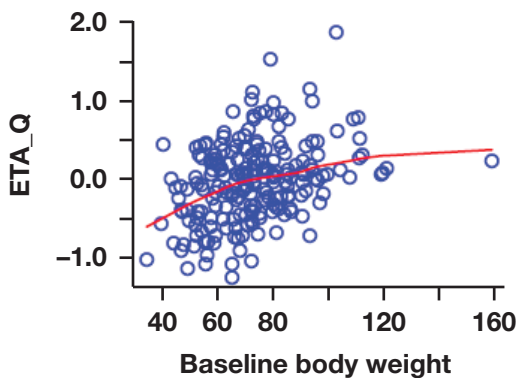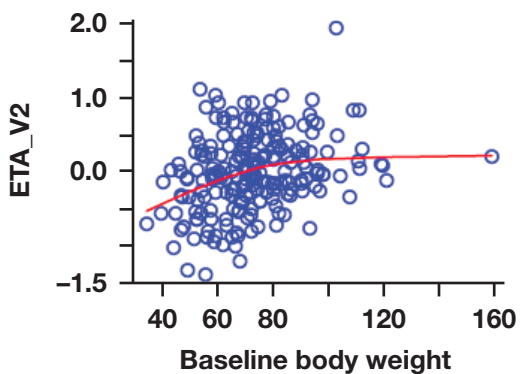

Supplement: CPT-104-374-s007.pdf [file CPT-104-374-s007.pdf]

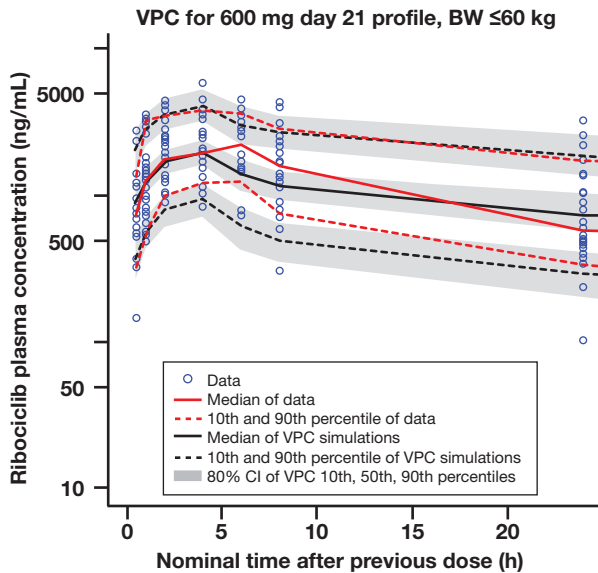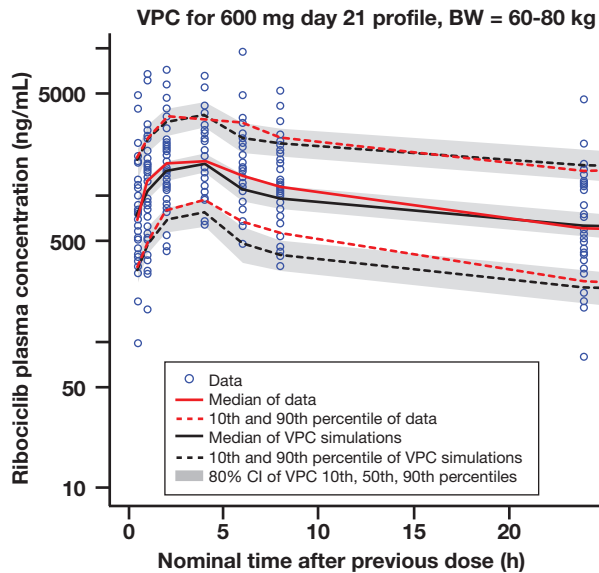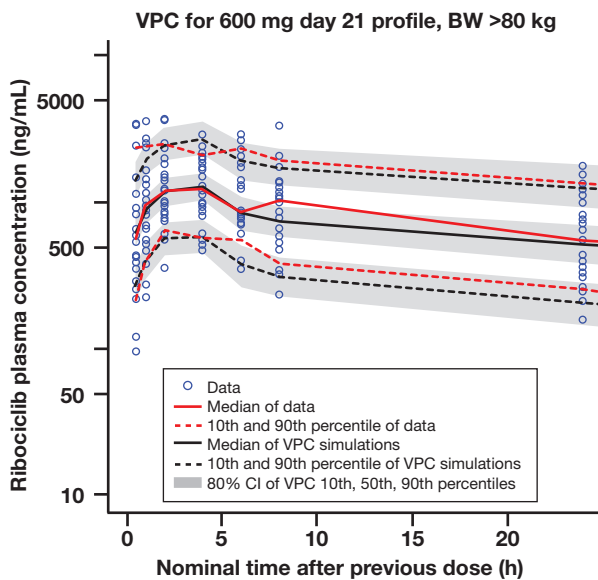

Supplement: CPT-104-374-s008.pdf [file CPT-104-374-s008.pdf]
